# Supplementary material for: Enhanced microwave assisted pyrolysis of waste rice straw through lipid extraction with supercritical carbon dioxide
Source: Royal Society of Chemistry journal article supplement (doi:10.1039/d3ra06758k), 2024-01-01
Supplement: d3ra06758k1.pdf [file d3ra06758k1.pdf]

## Supporting information

### Enhanced microwave assisted pyrolysis of waste rice straw through lipid extraction with supercritical carbon dioxide.

*Chanettee Sikhom,<sup>a,b</sup> Thomas M. Attard,<sup>a,c</sup> Weerapath Winotapun,<sup>c</sup> Nontipa Supanchaiyamat,<sup>e</sup>  
Thomas J. Farmer,<sup>a</sup> Vitaliy Budarin,<sup>a</sup> James H. Clark,<sup>a</sup> and Andrew J. Hunt.\*<sup>e</sup>*

<sup>a</sup> Green chemistry Centre of Excellence, Department of Chemistry, University of York,  
Heslington, York, YO10 5DD, UK.

<sup>b</sup> Department of Alternative Energy Development and Efficiency, Ministry of Energy, 17  
Rama I Road, Kasatsuk Bridge, Pathumwan, Bangkok, 10330, Thailand.

<sup>c</sup> RX extraction Ltd., Unit 10, Rowen Trade Estate, Neville Road, Bradford, BD4 8TQ, UK.

<sup>d</sup> Research and Development Institute, The Government Pharmaceutical Organization,  
Bangkok, 10400, Thailand.

<sup>e</sup> Materials Chemistry Research Center, Department of Chemistry and Center of Excellence  
for Innovation in Chemistry, Faculty of Science, Khon Kaen University, Khon Kaen, 40002,  
Thailand. \*Corresponding author: [andrew@kku.ac.th](mailto:andrew@kku.ac.th)

**Table S1** Type and quantity of saturated and unsaturated fatty acids in rice straw waxes obtained from different conditions using scCO<sub>2</sub> extraction for 4 hours.

| Free fatty acids                          | Abundance in the extracts in µg/g of dry plant |                    |                     |                   |                     |
|-------------------------------------------|------------------------------------------------|--------------------|---------------------|-------------------|---------------------|
|                                           | 35°C, 75 bar                                   | 35°C, 400 bar      | 50°C, 238 bar       | 65 °C, 75 bar     | 65°C, 400 bar       |
| Dodecanoic acid (C <sub>12:0</sub> )      | 1.0 ± 0.0                                      | 3.8 ± 0.0          | 3.4 ± 0.5           | 0.3 ± 0.0         | 4.8 ± 0.1           |
| Azelaic acid                              | 0.7 ± 0.0                                      | 2.6 ± 0.0          | 1.4 ± 0.0           | 0.2 ± 0.0         | 3.5 ± 0.0           |
| Tetradecanoic acid (C <sub>14:0</sub> )   | 6.3 ± 0.0                                      | 17.6 ± 0.0         | 15.7 ± 0.0          | 4.8 ± 0.0         | 20.9 ± 0.0          |
| Pentadecanoic acid (C <sub>15:0</sub> )   | 1.4 ± 0.0                                      | 7.0 ± 0.1          | 6.1 ± 0.0           | 0.4 ± 0.0         | 7.7 ± 0.0           |
| Hexadecanoic acid (C <sub>16:0</sub> )    | 30.7 ± 0.0                                     | 252.0 ± 0.4        | 236.9 ± 0.1         | 7.2 ± 0.0         | 267.6 ± 0.6         |
| Heptadecanoic acid (C <sub>17:0</sub> )   | 0.9 ± 0.0                                      | 9.1 ± 0.3          | 8.1 ± 0.1           | 0.2 ± 0.0         | 10.3 ± 0.8          |
| Linoleic acid (C <sub>18:2</sub> )        | 0.3 ± 0.0                                      | 21.4 ± 0.6         | 31.2 ± 1.2          | 0.2 ± 0.0         | 2.1 ± 0.1           |
| Oleic acid (C <sub>18:1</sub> )           | 0.8 ± 0.0                                      | 79.0 ± 1.0         | 96.6 ± 0.9          | 0.2 ± 0.0         | 20.0 ± 0.1          |
| Octadecanoic acid (C <sub>18:0</sub> )    | 4.5 ± 0.0                                      | 78.0 ± 2.7         | 70.9 ± 0.0          | 2.7 ± 0.0         | 81.3 ± 0.3          |
| Nonadecanoic acid (C <sub>19:0</sub> )    | 4.3 ± 0.0                                      | 12.2 ± 0.3         | 11.6 ± 1.0          | 1.1 ± 0.0         | 14.2 ± 1.4          |
| Eicosanoic acid (C <sub>20:0</sub> )      | 1.0 ± 0.0                                      | 33.3 ± 0.1         | 29.8 ± 0.5          | 0.4 ± 0.0         | 36.7 ± 1.8          |
| Heneicosanoic acid (C <sub>21:0</sub> )   | 1.7 ± 0.0                                      | 6.2 ± 0.3          | 5.7 ± 0.1           | 0.2 ± 0.0         | 9.1 ± 0.3           |
| Docosanoic acid (C <sub>22:0</sub> )      | 0.4 ± 0.0                                      | 15.5 ± 0.3         | 13.6 ± 0.4          | 0.1 ± 0.0         | 18.0 ± 0.1          |
| Tricosanoic acid (C <sub>23:0</sub> )     | 0.5 ± 0.0                                      | 10.9 ± 0.1         | 10.8 ± 0.0          | 0.1 ± 0.0         | 11.7 ± 0.5          |
| Tetracosanoic acid (C <sub>24:0</sub> )   | 0.5 ± 0.0                                      | 27.1 ± 0.1         | 29.2 ± 0.5          | 0.4 ± 0.0         | 37.6 ± 0.7          |
| Pentacosanoic acid (C <sub>25:0</sub> )   | 0.2 ± 0.0                                      | 5.3 ± 0.0          | 6.2 ± 0.2           | 0.1 ± 0.0         | 8.4 ± 0.4           |
| Hexacosanoic acid (C <sub>26:0</sub> )    | 0.2 ± 0.0                                      | 6.9 ± 0.2          | 9.0 ± 0.3           | 0.1 ± 0.0         | 12.2 ± 0.2          |
| Octacosanoic acid (C <sub>28:0</sub> )    | 0.3 ± 0.0                                      | 35.0 ± 1.2         | 64.1 ± 0.5          | 0.2 ± 0.0         | 78.9 ± 0.5          |
| Dotriacontanoic acid (C <sub>32:0</sub> ) | 0.7 ± 0.0                                      | 29.2 ± 0.7         | 23.4 ± 8.6          | 0.1 ± 0.0         | 36.5 ± 2.4          |
| <i>Total saturated fatty acids</i>        | <i>55.3 ± 0.0</i>                              | <i>551.7 ± 6.9</i> | <i>545.9 ± 12.8</i> | <i>18.6 ± 0.0</i> | <i>659.4 ± 10.1</i> |
| <i>Total unsaturated fatty acids</i>      | <i>1.1 ± 0.0</i>                               | <i>100.4 ± 1.5</i> | <i>127.8 ± 2.1</i>  | <i>0.4 ± 0.0</i>  | <i>22.1 ± 0.2</i>   |
| <b>Total Fatty acids identified</b>       | <b>56.4 ± 0.0</b>                              | <b>652.1 ± 8.4</b> | <b>673.7 ± 14.9</b> | <b>19.0</b>       | <b>681.5 ± 10.3</b> |

**Table S2** Types and quantity of main hydrocarbons in rice straw waxes obtained from different conditions using scCO<sub>2</sub> extraction for 4 hours.

| <i>n</i> -Alkane                  | Abundance in the extracts in µg/g of dry plant |                    |                    |                  |                    |
|-----------------------------------|------------------------------------------------|--------------------|--------------------|------------------|--------------------|
|                                   | 35°C, 75 bar                                   | 35°C, 400 bar      | 50°C, 238 bar      | 65 °C, 75 bar    | 65°C, 400 bar      |
| Heptacosane (C <sub>27</sub> )    | 0.7 ± 0.0                                      | 6.2 ± 0.4          | 6.4 ± 0.0          | 0.2 ± 0.0        | 7.7 ± 0.1          |
| Nonacosane (C <sub>29</sub> )     | 0.8 ± 0.1                                      | 22.4 ± 0.2         | 27.9 ± 0.0         | 0.3 ± 0.0        | 34.1 ± 0.1         |
| Hentriacontane (C <sub>31</sub> ) | 0.6 ± 0.0                                      | 23.9 ± 0.2         | 33.0 ± 0.1         | 0.2 ± 0.0        | 36.6 ± 1.5         |
| Trtriacontane (C <sub>33</sub> )  | 0.4 ± 0.0                                      | 130.1 ± 0.2        | 126.0 ± 0.6        | 0.3 ± 0.0        | 119.3 ± 0.1        |
| <b>Total <i>n</i>-alkanes</b>     | <b>2.5 ± 0.1</b>                               | <b>182.6 ± 1.0</b> | <b>193.3 ± 0.7</b> | <b>1.0 ± 0.0</b> | <b>197.8 ± 1.8</b> |

**Table S3** Types and quantities of long chain fatty alcohols in rice straw waxes obtained from different conditions using scCO<sub>2</sub> extraction for 4 hours.

| Fatty alcohols             | Abundance in the extracts in µg/g of dry plant |                    |                    |                  |                    |
|----------------------------|------------------------------------------------|--------------------|--------------------|------------------|--------------------|
|                            | 35°C, 75 bar                                   | 35°C, 400 bar      | 50°C, 238 bar      | 65 °C, 75 bar    | 65°C, 400 bar      |
| 1-Hexacosanol              | 0.1 ± 0.0                                      | 4.4 ± 0.0          | 5.4 ± 0.0          | TR               | 6.3 ± 0.0          |
| 1-Octacosanol              | 0.1 ± 0.0                                      | 7.4 ± 0.3          | 13.1 ± 0.2         | TR               | 15.6 ± 0.6         |
| 1-Triacontanol             | 0.6 ± 0.0                                      | 142.8 ± 0.1        | 127.3 ± 1.9        | 0.8 ± 0.0        | 107.4 ± 0.2        |
| <b>Total Fatty alcohol</b> | <b>0.8 ± 0.0</b>                               | <b>154.6 ± 0.4</b> | <b>145.8 ± 2.1</b> | <b>0.8 ± 0.0</b> | <b>129.3 ± 0.8</b> |

\* TR = *trace* amount

**Table S4** Types and quantities of long chain fatty aldehydes in rice straw waxes obtained from different conditions using scCO<sub>2</sub> extraction for 4 hours.

| Aldehydes                    | Abundance in the extracts in µg/g of dry plant |                    |                    |                  |                     |
|------------------------------|------------------------------------------------|--------------------|--------------------|------------------|---------------------|
|                              | 35°C, 75 bar                                   | 35°C, 400 bar      | 50°C, 238 bar      | 65 °C, 75 bar    | 65°C, 400 bar       |
| Triacontanal (C30)           | 0.1 ± 0.0                                      | 197.0 ± 2.0        | 177.9 ± 4.4        | 0.2 ± 0.0        | 149.8 ± 6.6         |
| Dotriacontanal (C32)         | 0.9 ± 0.2                                      | 56.7 ± 0.7         | 79.6 ± 0.6         | 0.8 ± 0.0        | 107.6 ± 10.1        |
| <b>Total fatty aldehydes</b> | <b>1.0 ± 0.2</b>                               | <b>253.7 ± 2.7</b> | <b>257.5 ± 5.0</b> | <b>1.0 ± 0.0</b> | <b>257.4 ± 16.7</b> |

**Table S5** Types and quantities of long chain fatty aldehydes in rice straw waxes obtained from different conditions using scCO<sub>2</sub> extraction for 4 hours.

| Sterols              | Abundance in the extracts in µg/g of dry plant |                   |                     |               |                    |
|----------------------|------------------------------------------------|-------------------|---------------------|---------------|--------------------|
|                      | 35°C, 75 bar                                   | 35°C, 400 bar     | 50°C, 238 bar       | 65 °C, 75 bar | 65°C, 400 bar      |
| Campesterol          | 1.0                                            | 67.2 ± 0.9        | 148.0 ± 0.4         | 0.1           | 205.8 ± 0.7        |
| β-sitosterol         | 0.4                                            | 30.2 ± 4.3        | 32.4 ± 19.4         | 0.3           | 60.9 ± 1.1         |
| <b>Total sterols</b> | <b>1.4</b>                                     | <b>97.4 ± 5.2</b> | <b>180.4 ± 19.8</b> | <b>0.4</b>    | <b>266.7 ± 1.8</b> |

**Table S6** Types and quantities of steroid ketones in rice straw waxes obtained from different conditions using scCO<sub>2</sub> extraction for 4 hours.

| Steroid ketones              | Abundance in the extracts in µg/g of dry plant |                   |                    |               |                    |
|------------------------------|------------------------------------------------|-------------------|--------------------|---------------|--------------------|
|                              | 35°C, 75 bar                                   | 35°C, 400 bar     | 50°C, 238 bar      | 65 °C, 75 bar | 65°C, 400 bar      |
| Stigmast-4-en-3-one          | 0.8                                            | 51.7 ± 0.2        | 84.6 ± 0.3         | 0.5           | 126.4 ± 2.4        |
| 5α-Stigmastane-3,6-dione     | 1.7 ± 1.5                                      | 39.5 ± 0.2        | 81.7 ± 1.5         | 1.1           | 98.0 ± 3.7         |
| <b>Total steroid ketones</b> | <b>2.5 ± 1.5</b>                               | <b>91.2 ± 0.4</b> | <b>166.3 ± 1.8</b> | <b>1.6</b>    | <b>224.4 ± 6.1</b> |

**Table S7** Types and quantities of wax esters in rice straw waxes obtained from different conditions using scCO<sub>2</sub> extraction for 4 hours.

| Wax esters              | Abundance in the extracts in µg/g of dry plant |                   |                    |                  |                    |
|-------------------------|------------------------------------------------|-------------------|--------------------|------------------|--------------------|
|                         | 35°C, 75 bar                                   | 35°C, 400 bar     | 50°C, 238 bar      | 65 °C, 75 bar    | 65°C, 400 bar      |
| Wax C42                 | 0.1                                            | 10.8              | 18.2 ± 1.0         | TR               | 22.5               |
| Wax C44                 | 0.3                                            | 23.7              | 47.8 ± 0.1         | 0.1              | 56.2 ± 0.1         |
| Wax C46                 | 0.7                                            | 21.5 ± 0.1        | 49.6 ± 0.8         | 0.3              | 60.6 ± 0.2         |
| Wax C48                 | 0.6                                            | 12.0 ± 0.2        | 32.5               | 0.4              | 47.0 ± 0.2         |
| Wax C50                 | 0.4                                            | 7.4               | 20.6               | 0.3              | 37.2 ± 0.2         |
| Wax C52                 | 0.3                                            | 3.2               | 8.0 ± 0.1          | 0.2              | 21.5 ± 0.1         |
| Wax C54                 | 0.1                                            | 1.3               | 1.2 ± 0.1          | 4.5 ± 0.1        | 10.3               |
| <b>Total wax esters</b> | <b>2.5</b>                                     | <b>79.9 ± 0.3</b> | <b>177.9 ± 2.1</b> | <b>5.8 ± 0.1</b> | <b>255.3 ± 0.8</b> |

**Table S8** Extraction yields obtained at different pressures and temperatures for rice straw.

| Experiments | Temperature<br>(°C) | Pressure<br>(bar) | Density of CO <sub>2</sub><br>(g.cm <sup>-3</sup> ) | Yield<br>(dry biomass) |
|-------------|---------------------|-------------------|-----------------------------------------------------|------------------------|
| 1           | 35                  | 75                | 0.27                                                | 0.05                   |
| 2           | 35                  | 400               | 0.97                                                | 0.41                   |
| 3           | 50                  | 238               | 0.82                                                | 0.52                   |
| 4           | 65                  | 75                | 0.16                                                | 0.01                   |
| 5           | 65                  | 400               | 0.87                                                | 0.70                   |

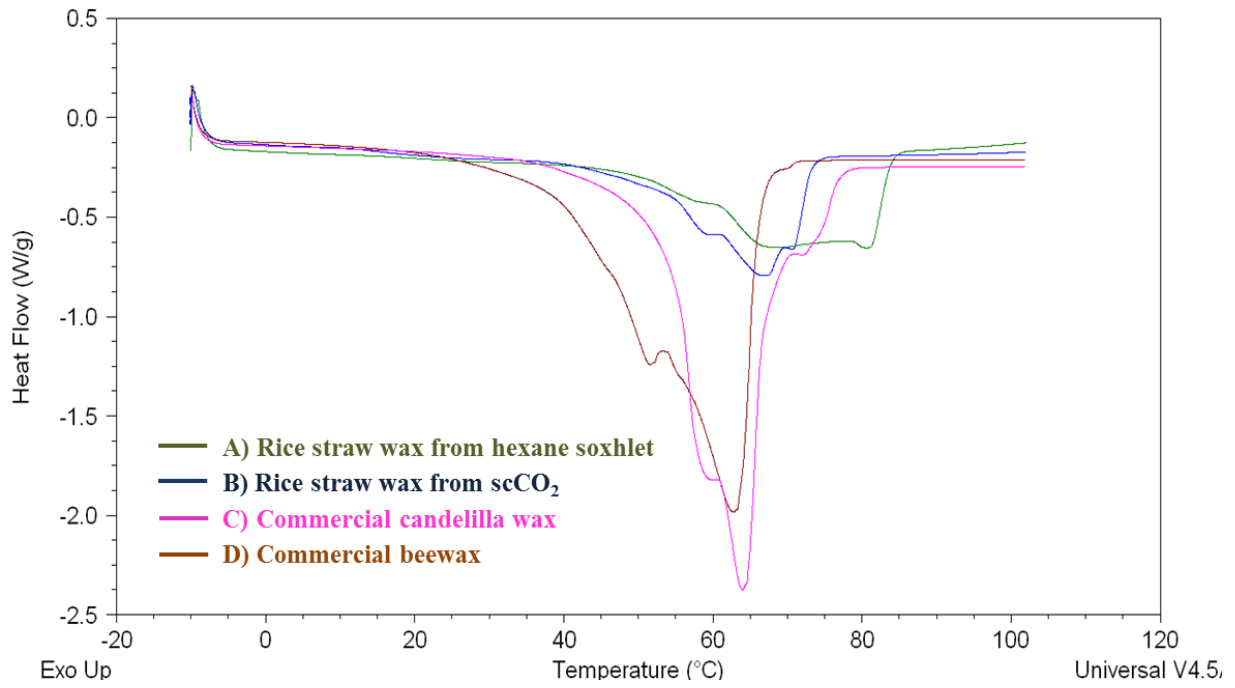

**Figure S1** DSC plot showing the melting profiles for different waxes, (A) hexane Soxhlet, (B) scCO<sub>2</sub> at 65 °C and 400 bar for 4 hours, (C) Commercial candelilla wax, and (D) Commercial beeswax.

**A**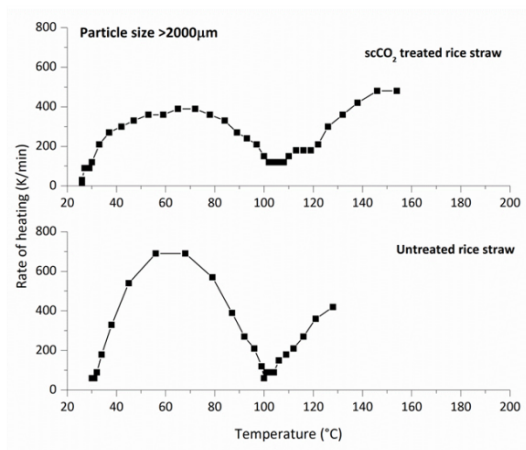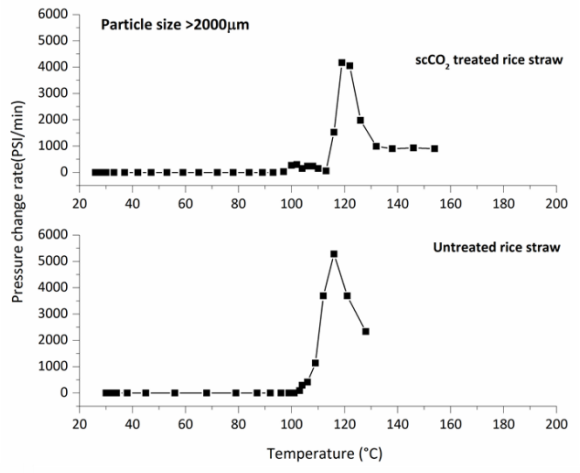**B**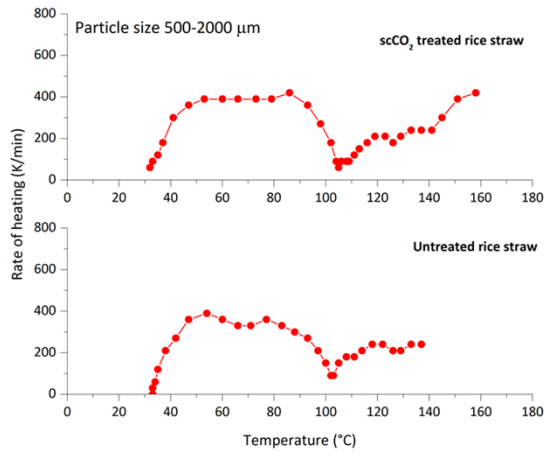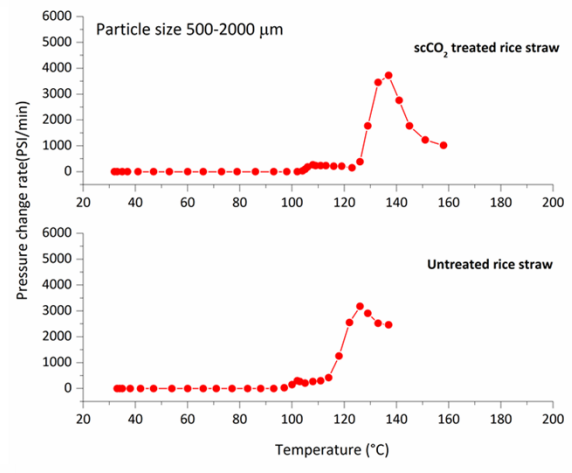**C**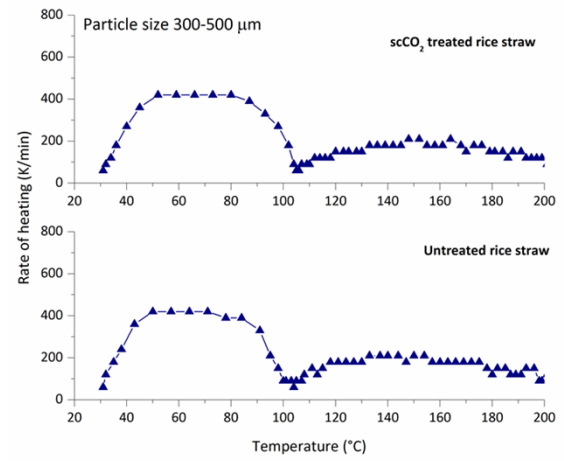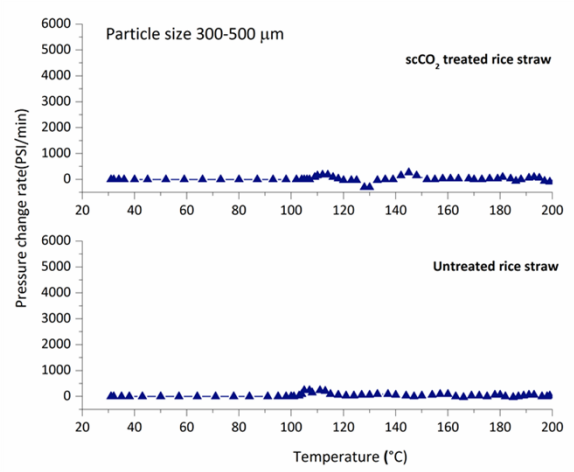

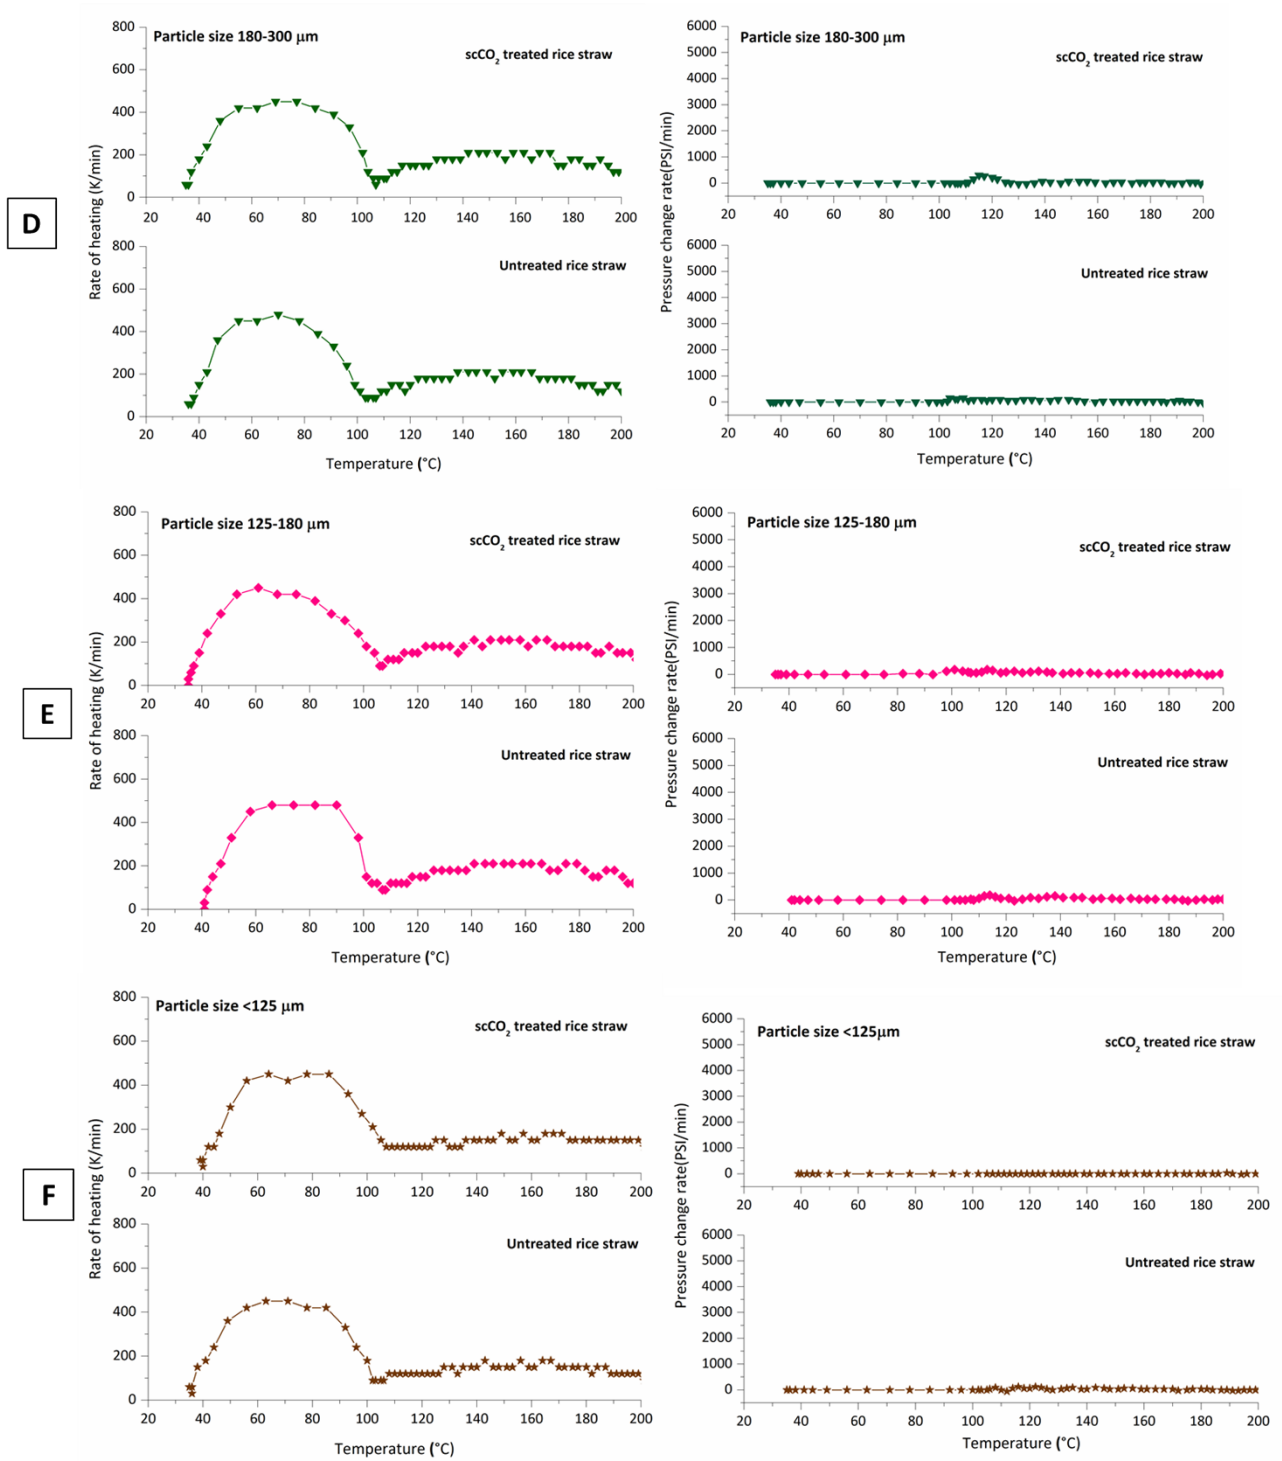

**Figure S2** The comparison and the evolution of heating rates and pressure change rates of untreated and scCO<sub>2</sub> treated rice straw according to particle sizes A) >2000 μm, B) 500-2000 μm, C) 300-500 μm, D) 180-500 μm, E) 125-180 μm and F) <125 μm.



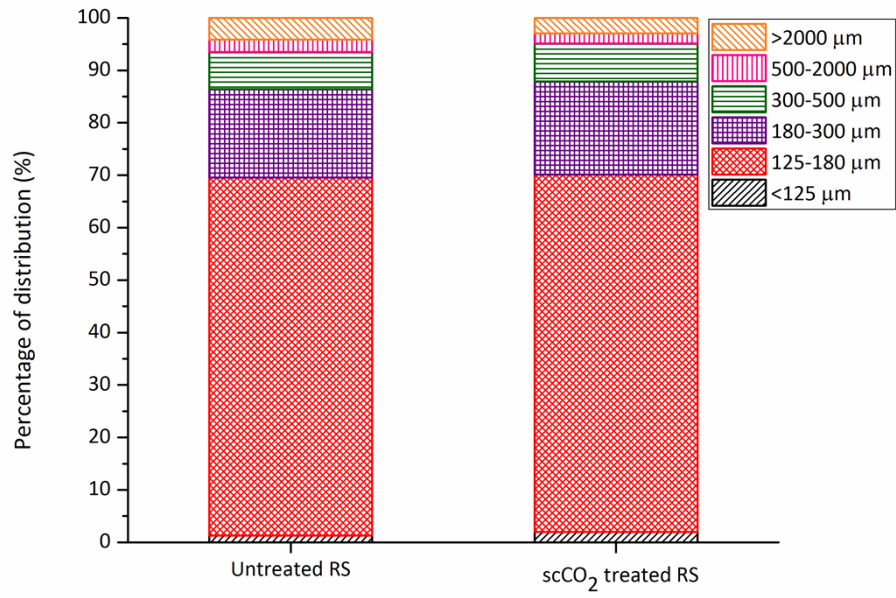

**Figure S3** Particle size distribution of untreated and scCO<sub>2</sub> treated rice straw after milling.
